# Supplementary material for: siRNA–Mediated Methylation of Arabidopsis Telomeres
Source: PLoS Genet. 2010 Jun 10;6(6):e1000986. doi: 10.1371/journal.pgen.1000986 (PMC2883606; doi:10.1371/journal.pgen.1000986)
Supplement: Table S1 — Argonaute-associated telomeric siRNAs. The region of homology to the Arabidopsis telomeric sequence is indicated in red. (0.03 MB XLS) [file pgen.1000986.s007.xls]

## Sheet: Sheet1
	G-siRNAs						C-siRNAs
	Sequence (telomeric sequence in red)	Representation	Homology to telomere	Length (nt)	Argonaute		Sequence (telomeric sequence in red)	Representation	Homology to telomere (nt)	Length (nt)	Argonaute
	AGGGTTTAGGGTTTAGGGTTTAGG	8	24	24	AGO4		AATGAGAAACCCTAAACCCAACA	1	13	23	AGO4
	AGGGTTTAAGGTTTAGGGTTTAGG	3	23	24	AGO4		GAGAAACCCTAAACCCAACAAGA	1	13	23	AGO4
	AGGGTTAAGGGTTTAGGGTTTAGG	1	23	24	AGO4		ATCTAAACCCTAAAACTTGC	1	12	20	AGO4
	AGGGTTTAGGGTTTAGGGTTAAGG	2	23	24	AGO4		AGATCCATTTTTAAACCCTAAACT	1	12	24	AGO4
	AGGGTTTAGTGTTTAGGGTTTAGG	2	23	24	AGO4		AACACTAAATCGTAAACCCTAAAC	1	12	24	AGO4
	AAGTTTAGGGTTTAGGGTTTAGGGT	1	23	25	AGO4		AAACCGCTGGCTAAACCCTAAAAG	1	12	24	AGO4
	AGGGTTGAGGGTTTAGGGTTTAGG	1	23	24	AGO4		ACTAAACCCTAAAACTGGCGTGTG	1	12	24	AGO4
	AGGGTTTACGGTTTAGGGTTTAGG	1	23	24	AGO4		AAACCCTAAACCTAACCAAACGA	1	12	23	AGO4
	TGGTTTAGGGTTTAGGGTTTAGGG	1	23	24	AGO4		CCTAAACCCTAAACCCTAAACTGT	1	22	24	AGO5
	AGGGTTTAGGGTTCAGGGTTTAGG	1	23	24	AGO4		CTAAACCCTAAACCCTAAACTG	1	20	22	AGO5
	AGGTTTAGGGTTTAGGGTTTAGGG	1	23	24	AGO4		CTAAACCCTAAACTGTTCGAATAT	1	13	24	AGO5
	AATTTAGGGTTTAGGGTTTAGGGT	1	22	24	AGO4		CTAAACCCTAAAGATGGTATGGAA	1	12	24	AGO5
	AGGGTTTAGGGTTTAGGGTTTAAG	1	22	24	AGO4
	AGGGTTTACAGTTTAGGGTTTAGG	1	22	24	AGO4
	AGGGTTTAGGGTTTAGGGTTTA	1	22	22	AGO4
	AGGATTTAGGGTTTAGGGTTTAGG	1	22	23	AGO4
	GAGGTTTAGGGTTTAGGGTTTAGG	1	22	24	AGO4
	AGTGTTTAGGGTTTAGGGTTTAGG	2	21	24	AGO4
	AGGGTTTAGGGTTTAGGGTTT	2	21	21	AGO4
	AGAGTTTAGGGTTTAGGGTTTAGG	1	21	24	AGO4
	ATGGTTTAGGGTTTTGGGTTTAGG	1	21	23	AGO4
	AAAGTTTAGGGTTTAGAGTTTAGG	1	20	24	AGO4
	AGCGTTAGGGTTTAGGGTTTAGGG	1	20	24	AGO4
	AGGGTTTATAGTTTAGGGTTTA	1	20	22	AGO4
	AAGGTTTAGGGTTTAGGGTTTAAG	2	20	24	AGO4
	AGGTTTAAGGGTTTAGGGTTAAGA	1	19	24	AGO4
	AGCGTTAGGGTTTAGGGTCTAGGG	2	19	24	AGO4
	TTTAGGGTTTAGGGTTTAGGAAA	1	19	22	AGO4
	TAAGAGTTTAGGGTTTAGGGTTTA	1	19	24	AGO4
	ATTTAGGGTTTAGGGTTTATGGTT	1	18	24	AGO4
	AGGATTGGGATTTAGGGTTTAGTG	1	18	24	AGO4
	GTTAAGAGTTTAGGGTTTAGGGTT	1	17	24	AGO4
	ATTCAGAGGTTTAGGGTTTAGGGT	1	17	24	AGO4
	AAGAGTTTAGGGTTTAGGGTTAAG	1	17	24	AGO4
	GTTTAGGGTTTAGGGTGTAGAGGG	1	16	24	AGO4
	AAGGTTTAGGGTTTAGGGATTAGA	1	16	24	AGO4
	ATAATTTAGGGTTTAGGGTA	1	15	20	AGO4
	ATGTATTTTAGGGTTTAGGGTAAA	3	15	24	AGO4
	AGGGTTTAGGGTTTACGGTTTTGG	1	15	24	AGO4
	AGCGTTAGGGTTTAGGGTT	1	15	19	AGO4
	AGAGCTTAGGATTTAGGGTTTAGG	4	15	23	AGO4
	TTTAGGGTTTAGGGTACGTGA	1	15	21	AGO4
	AAACTTAGGATTTAGGGTTTAGGC	1	15	23	AGO4
	GGGATCTATGGTTTAGGGTTTAGG	1	15	24	AGO4
	ATGTATTTTAGGGTTTAGGG	1	14	20	AGO4
	TGGGGTCTATGGTTTAGGGTTTAG	1	14	24	AGO4
	GTTTAGGGTTTAGGATTTAG	2	14	20	AGO4
	ATGTACGGTTTAGGGTTTAGA	1	14	21	AGO4
	AGGGTTAAGAGTTTAGGGTTTAGG	1	14	24	AGO4
	AGGGTGTACGGTTTAGGGTTTAGA	2	14	24	AGO4
	TGGGTTAAAGTTTAGGGTTTAGGA	1	14	24	AGO4
	TGTATTGATGGTTTAGGGTTTAGT	1	14	24	AGO4
	AGGTTTTAGTGTTTAGGGTTTAGG	1	14	24	AGO4
	AAGAGTTTAGGGTTTAGGTTTAAG	1	14	24	AGO4
	ATGGATTAAAGTTTAGGGTTTAGG	1	14	24	AGO4
	AGGGTTTAGGGTTAAGAGTTTAGG	1	13	24	AGO4
	AGGGGTTAGGGTTTAGGGGTTGAA	1	13	24	AGO4
	ATGGGTTAAAGTTTAGGGTTTAGA	1	13	24	AGO4
	AGGGTTTAGGGTTAAGGGA	1	13	19	AGO4
	AGGGTTTAGGGTTAATGGACCATG	3	13	24	AGO4
	AAGGTTTAGCGTTAGGGTTTAGGG	2	13	24	AGO4
	AGGACTTAGGGTTTAGGGGTT	1	13	21	AGO4
	GTTAGGGTTTAGGGGTTGG	1	13	19	AGO4
	AAGGGTTAGGGTTTAGGGGTTGGA	1	13	24	AGO4
	AGGGCTTGGAGTTTAGGGTTTATG	1	12	24	AGO4
	ATAGTTTAGGGTTTAAAAATGGA	1	12	23	AGO4
	AAGTTTTGGATCTAGGGTTTAGGG	1	12	24	AGO4
	ATTAGGTTTAGGGTTTGATGCGGC	1	12	24	AGO4
	TGGGACAAAATTTAGGGTTTAGCT	1	12	24	AGO4
	AAGATTTAAGGTTTAGGGTTTGAG	1	12	24	AGO4
	ATTTTAGGGTTTAGTGTAAATATT	1	12	24	AGO4
	GTTTAGGTTTAAGGGTTTAGGGT	1	12	23	AGO4
	AAATATTTTAGGGTTTAGTGTAA	1	12	23	AGO4
	AGTTTAGGGTTTAAAAATGGATCT	2	12	24	AGO4
	AGAGAACGCTTTTAGGGTTTAGCC	2	12	24	AGO4
	AAAATGGGTTTAGGGTTAGATTGA	1	12	24	AGO4
	AAAAATTAGGTTTAGGGTTTGAGG	1	12	24	AGO4
	AGGGTTTAGGGTAATGTTATAGGG	1	12	24	AGO4
	TAGGGTTTAGGGTTTAGGGTTTA	1	23	23	AGO5
	CGAACAGTTTAGGGTTTAGGGTTT	1	18	24	AGO5
	CGAACAGTTTAGGGTTTAGGGTT	1	17	23	AGO5
	CGCTGGTTAGGGTTTAGGGTTGCG	1	15	24	AGO5
	ATTCGAACAGTTTAGGGTTTAGG	1	14	23	AGO5
	ATAAAATTTTAGGGTTTAGTT	1	12	21	AGO5
	ATTTTAGGGCTTAGGGTTTAGG	1	19	21	AGO2
	AGTTTAGGGTTTAAAAATGGA	2	12	21	AGO2
	TTAGGGATTTAGGGTTTAGGGTTT	1	23	23	AGO1
	TAGGGTTTAGGGTTTAGGGTTT	1	22	22	AGO1
	TAGCGTTAGGGTTTAGGGTTTA	4	17	22	AGO1
	TTTATGGTTTAGGGTTTACGGTTC	1	13	24	AGO1
